# Supplementary material for: Assessing the Clinical Impact of the SARS-CoV-2 Gamma Variant on Intensive Care Unit Admissions: Insights from a Reference Hospital in Northeastern Brazil
Source: MDPI journal article supplement (doi:10.3390/v16030467), 2024-03-20
Supplement: s1 [file s1]

**Supplementary Table S1.** Reference ranges for laboratory indicators utilized by São Rafael Hospital's laboratory.

| Parameters         | Reference value                                                         |
|--------------------|-------------------------------------------------------------------------|
| CRP (mg/L)         | < 10,0 mg/L                                                             |
| D-dimer (ng/mL)    | < 500 ng/mL                                                             |
| Fibrinogen (mg/dL) | 200 a 400 mg/dL                                                         |
| APTT (seg)         | 25.0 to 40.0 seconds                                                    |
| NtProBNP, pg/mL    | Age <50: 450 pg/mL<br>Age 50-75: 900 pg/mL<br>Age > 75 yars: 1800 pg/mL |
| Troponin 1, ng/mL  | <0.034 ng/mL                                                            |
| LDH, U/L           | 120 a 246 U/L                                                           |
| Ferritin, ng/mL    | 17.9-464.0 ng/mL                                                        |
| Bilirubin, mg/dL   | 0,2 to 1,3 mg/dL                                                        |
| ALP, U/L           | 38 to 126 U/L                                                           |
| CK, U/L            | Female: 30 a 135 U/L<br>Male: 55 a 170 U/L                              |
| GGT, U/L           | Female: 12 to 43 U/L<br>Male: 15 to 73 U/L                              |
| ALT, U/L           | Female: < 35 U/L<br>Male: < 50 U/L                                      |
| AST, U/L           | 17 to 59 U/L                                                            |
| Creatinine, mg/dL  | 0.70 a 1.20 mg/dL                                                       |
| Urea, mg/dL        | 19 a 43 mg/dL                                                           |

Abbreviations: CPR: C-Reactive Protein; APTT: Activated Partial Thromboplastin Time; ALP: Alkaline Phosphate; CK: Creatine Kinase; GGT: Gamma-glutamyl Transferase; ALT: Alanine Aminotransferase ; AST: Aspartate aminotransferase

**Supplementary Table S2.** Optimized primer list for the SARS-CoV-2 variant detection using the PCR method for genotyping

| <b>ID</b>                   | <b>DNA sequences (5'-3')</b>           |
|-----------------------------|----------------------------------------|
| <b>F3-69/70del forward</b>  | ACGTGGTGTTTATTACCCTGACA                |
| <b>R3-69/70del reverse</b>  | TGGTAGGACAGGGTTATCAAAC                 |
| <b>S3-69/70del Probe</b>    | Cy5-CCATGCTATACATGTCTCTGGGA-BHQ2       |
| <b>F3-Orf1a-del forward</b> | TGCCTGCTAGTTGGGTGATG                   |
| <b>R3-Orf1a-del reverse</b> | AGTAACACTACAGCTGATGCA                  |
| <b>S3-Orf1a-del-Probe</b>   | HEX-TAGTTTGTCTGGTTTTAAGCTAAAAGACT-BHQ1 |
| <b>N1-F forward</b>         | GACCCCAAATCAGCGAAAT                    |
| <b>N1-R reverse</b>         | TCTGGTTACTGCCAGTTGAATCTG               |
| <b>N1- Probe</b>            | FAM-ACCCCGCATTACGTTTGGTGGACC-BHQ1      |
